# Supplementary material for: Novel Missense Variants in PAX8 and NKX2-1 Cause Congenital Hypothyroidism
Source: MDPI journal article supplement (doi:10.3390/ijms24010786), 2023-01-02
Supplement: s1 [file s1]

**Table S1.** Function and conservative prediction of variants.

| Variants         | Polyphen-2_HVAR    | SIFT     | MutationTaster   | PROVEAN  | ClinPred   | REVEL    | GERP++    | MutationAssessor |
|------------------|--------------------|----------|------------------|----------|------------|----------|-----------|------------------|
| PAX8: c.149A>C   | Probably_ damaging | Damaging | Disease_ causing | Damaging | pathogenic | Damaging | Conserved | High             |
| PAX8: c.329G>A   | Probably_ damaging | Damaging | Disease_ causing | Damaging | pathogenic | Damaging | Conserved | Low              |
| NKX2-1: c.706A>G | Probably_ damaging | Damaging | Disease_ causing | Damaging | pathogenic | Damaging | Conserved | Medium           |

**Table S2.** Primers used for the expression vectors and thyroglobulin (TG)-promoter cloning.

| Vector              | Forward primer                                | Reverse primer                                | Variant/Insert                     |
|---------------------|-----------------------------------------------|-----------------------------------------------|------------------------------------|
| TG-pGL3             | GATCTGGATCTAAGTAAGCTTCAGGCAG<br>AGTGGATCTGAGC | CAGTACCGGAATGCCAAGCTTTTCCTG<br>GGAGGAAGGAGGAG | TG promoter sequence<br>(-411/+89) |
| PAX8-c149- pCMV3    | ACATCTCTCGCCCGCTCCGCGTCAGCCA<br>TGGC          | GAGCGGGCGAGAGATGTCGCAGGGCC<br>TTACAC          | c.149A>C (p.Q50P)                  |
| PAX8-c329- pCMV3    | ATCCGAGACCAGCTCCTGGCTGAGGGCG<br>TCTG          | AGGAGCTGGTCTCGGATCTCCCAGGCA<br>AACAT          | c.329G>A (p.R110Q)                 |
| NKX2-1-c706-pCMV3   | CAGGTCGAGATCTGGTTCCAGAACCACC<br>GCTA          | AACCAGATCTCGACCTGCGTGGGCGTC<br>AGGTGGAT       | c.706A>G (p.K236E)                 |
| NKX2-1-GFP-pcDNA3.1 | TAACGGCCGCCAGTGTGCTGGAATTCAT<br>GTGGTCCGGAGGC | TTGCTCACCATGGTGGGCCAGGTCCGA<br>CCGTATA        | <i>NKX2-1</i> cDNA sequence        |

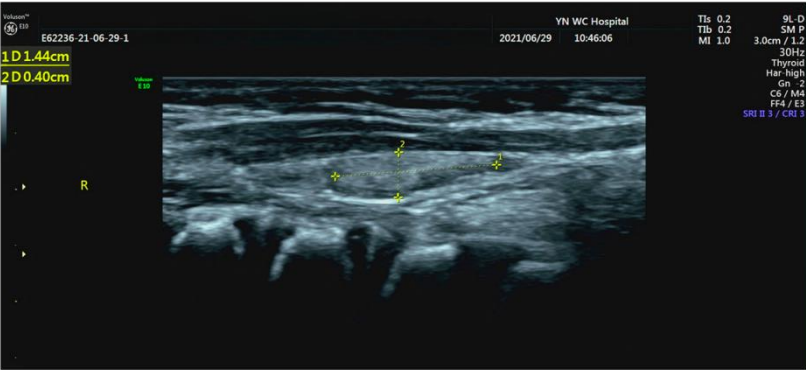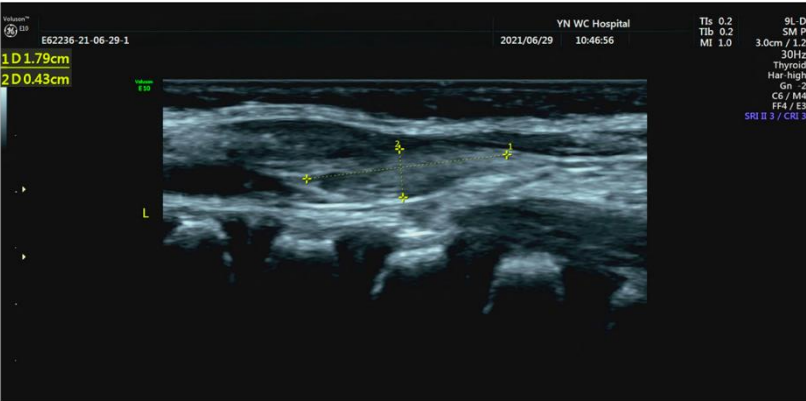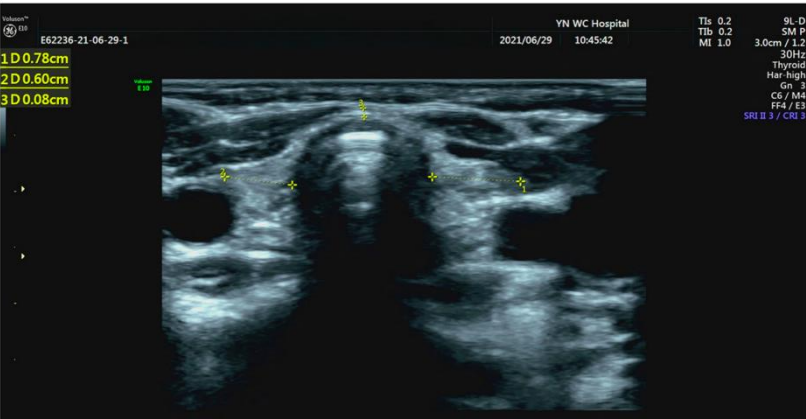

**Figure S1.** The thyroid ultrasound of P3. The sectional size of bilateral thyroid lobes: 1.44 \* 0.78 \* 0.40cm on the right (reference values for 4 years old, 2.79\*0.86\*0.69 cm), 0.08cm thick at the isthmus (reference value 0.14 cm), 1.79 \* 0.60 \* 0.43 cm on the left (reference values 2.66\*0.94\*0.60 cm).

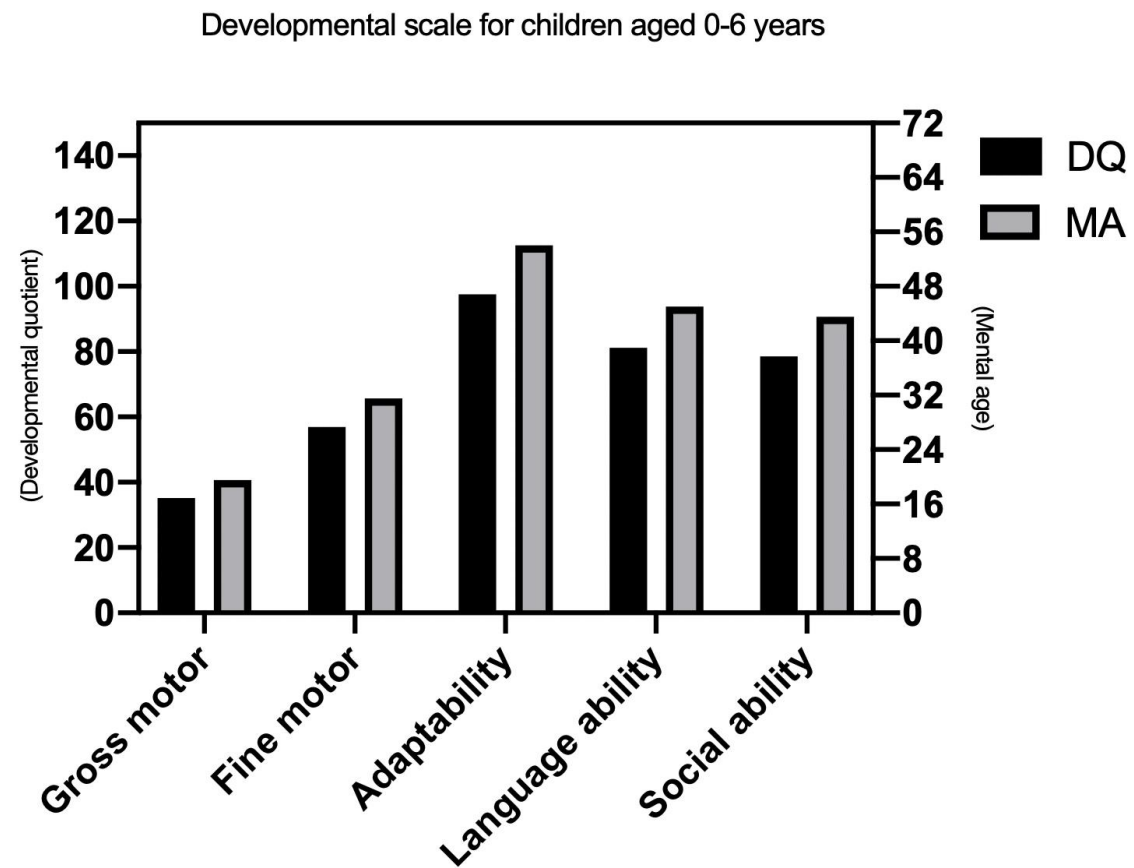

**Figure S2.** The developmental evaluation of P3 at 55 months. The average developmental quotient is 69.9 (The reference values of score for 0-3-year-old children, 90-115), and the average intellectual age is 38.7 months.
